# Supplementary material for: Improved sensitive detection of Pb2+ and Cd2+ in water samples at electrodeposited silver nanonuts on a glassy carbon electrode
Source: Royal Society of Chemistry journal article supplement (doi:10.1039/c1ay05265a), 2011-01-01
Supplement: c1ay05265a.pdf [file c1ay05265a.pdf]

## Improved sensitive detection of $\text{Pb}^{2+}$ and $\text{Cd}^{2+}$ in water samples at electrodeposited silver nanonuts on glassy carbon electrode

S. Prakash and Vinod K. Shahi\*

*Electro-Membrane Processes Division, Central Salt & Marine Chemicals Research Institute, Council of Scientific & Industrial Research (CSIR), G. B. Marg, Bhavnagar-364002 (Gujarat), INDIA Tel:+91-278-2569445; Fax: +91-278-2567562/2566970; E-mail: [vkshahi@csmcri.org](mailto:vkshahi@csmcri.org) [vinodshahi1@yahoo.com](mailto:vinodshahi1@yahoo.com)*

**Table S1.** The effect of different metals (500 ppm) on the normalized current  $I_p/I_o$  ( $I_o$  and  $I_p$  represent the peak current of analyte before and after the surfactant, respectively) at modified electrode for synthetic solution containing 50 ppb of  $\text{Pb}^{2+}$  and 50 ppb of  $\text{Cd}^{2+}$ .

| Metal ion        | $I_p/I_o$ (%)    |                  |
|------------------|------------------|------------------|
|                  | $\text{Pb}^{2+}$ | $\text{Cd}^{2+}$ |
| $\text{Na}^+$    | 98.6             | 98.7             |
| $\text{K}^+$     | 98.2             | 98.9             |
| $\text{Ca}^{2+}$ | 107.2            | 103.2            |
| $\text{Mg}^{2+}$ | 106.7            | 102.3            |
| $\text{Co}^{2+}$ | 103.3            | 102.6            |
| $\text{Ni}^{2+}$ | 85.1             | 81.3             |
| $\text{Fe}^{2+}$ | 109.1            | 98.7             |
| $\text{Cu}^{2+}$ | 102.6            | 107.0            |
| $\text{Zn}^{2+}$ | 107.2            | 105.2            |
